# Supplementary material for: Recombinant laccase from Pediococcus acidilactici CECT 5930 with ability to degrade tyramine
Source: PubMed Central journal article supplement (PMC5636118; doi:10.1371/journal.pone.0186019), 2017-10-11

=====

|                 |   |                                                  |            |   |          |
|-----------------|---|--------------------------------------------------|------------|---|----------|
| Acq. Operator   | : |                                                  | Seq. Line  | : | 5        |
| Acq. Instrument | : | Instrument 1                                     | Location   | : | P1-A-05  |
| Injection Date  | : | 22/01/2013 13:16:14                              | Inj        | : | 1        |
|                 |   |                                                  | Inj Volume | : | Inj prog |
| Acq. Method     | : | C:\CHEM32\1\DATA\AB 2013-01-22 11-33-12\AB-PFP.M |            |   |          |
| Last changed    | : | 22/01/2013 9:35:26                               |            |   |          |
| Analysis Method | : | C:\CHEM32\1\METHODS\BA-FIN.M                     |            |   |          |
| Last changed    | : | 07/06/2017 16:33:49                              |            |   |          |
| Method Info     | : |                                                  |            |   |          |

Current Chromatogram(s)

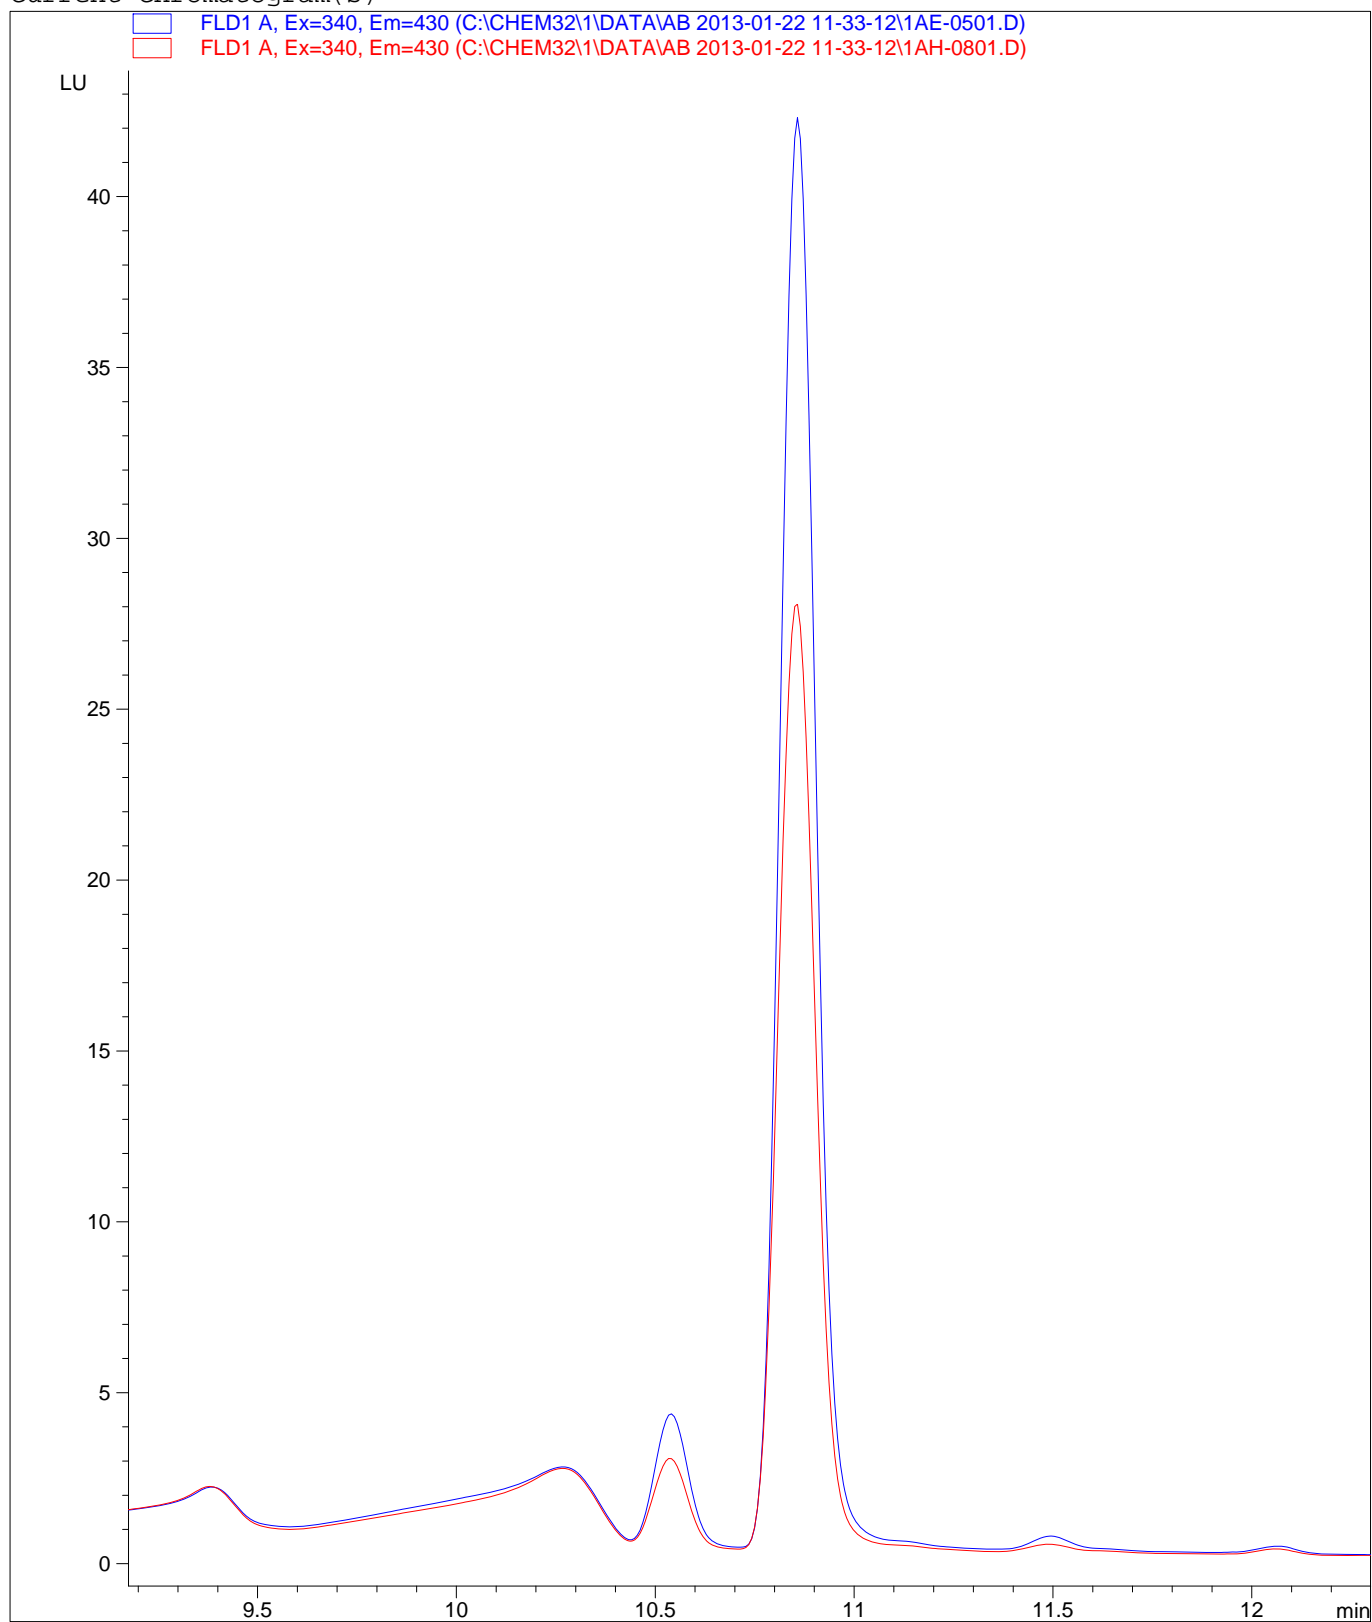

Supplement: pone.0186019.s002.pdf [file pone.0186019.s002.pdf]
